# Supplementary material
Source: PubMed Central journal article supplement (PMC6445715)
Supplement: NIHMS1517648-supplement-1.pdf [file NIHMS1517648-supplement-1.pdf]

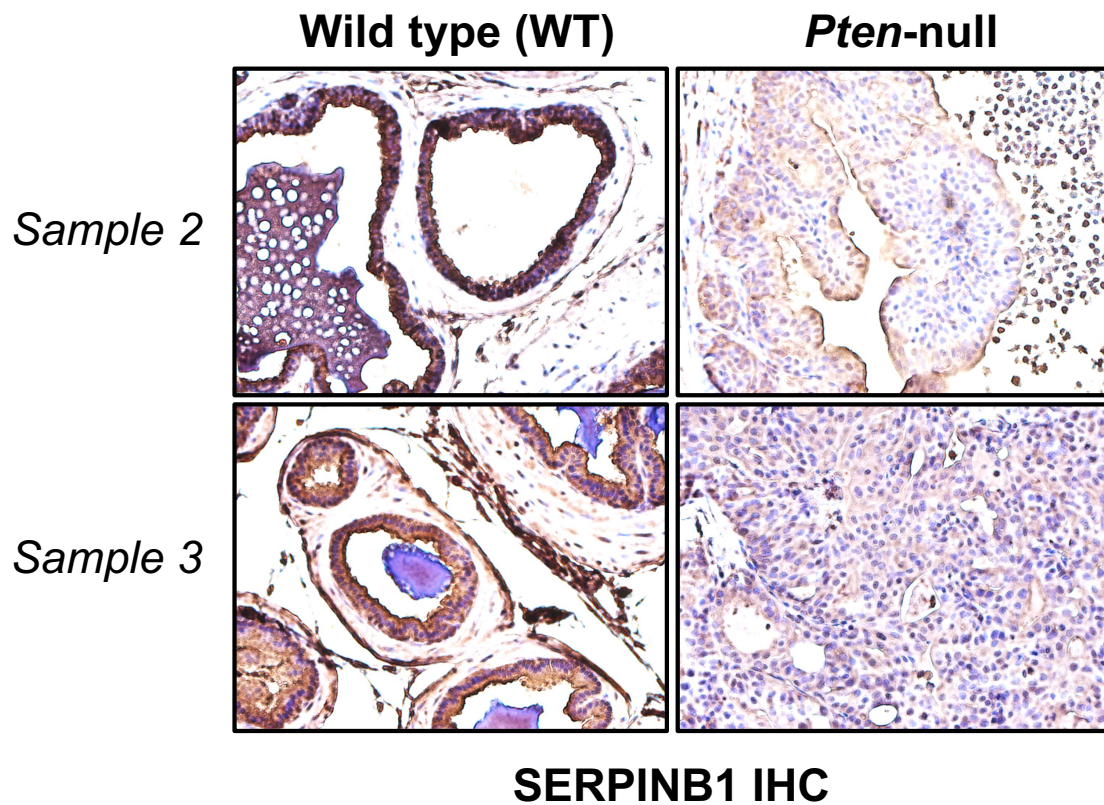

### SERPINB1 IHC

**Supplementary Figure 1.** *SERPINB1* expression is reduced in *Pten*-null compared to wild type mouse prostates. Two additional paired samples demonstrating immunohistochemistry staining for *SERPINB1* in wild-type and *Pten*-null mouse prostates, as in Figure 1F.
