# Supplementary material
Source: PubMed Central journal article supplement (PMC6445715)
Supplement: NIHMS1517648-supplement-3.pdf [file NIHMS1517648-supplement-3.pdf]

## A. LNCaP

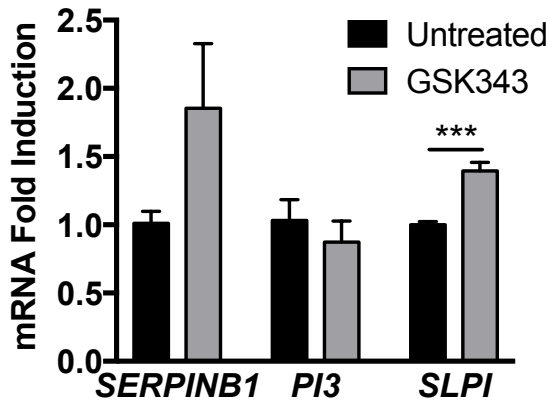

## B. LNCaP

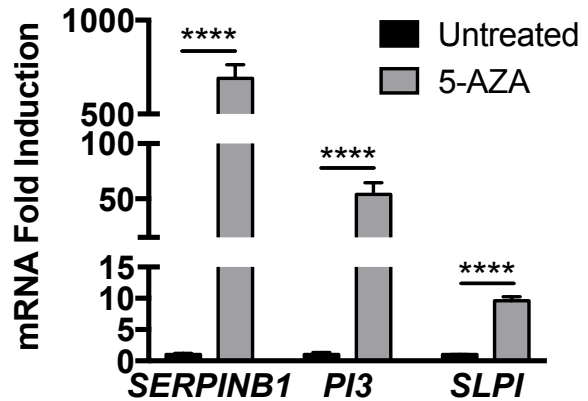

**Supplementary Figure 3.** Epigenetic repression of endogenous NE inhibitors in LNCaP cells. A. LNCaP cells were treated with EZH2 inhibitor GSK343 (10  $\mu$ M) for 72 hours. mRNA expression of *SERPINB1*, *PI3*, and *SLPI* were determined using quantitative PCR and normalized to *GAPDH*. Data were normalized to untreated samples, and differences were assessed using Student's t-test (n = 4; \*\*\* p < 0.001). B. LNCaP cells were treated with DNMT inhibitor 5-aza-2-deoxycytidine (5-AZA, 10  $\mu$ M) for 72 hours. mRNA expression of *SERPINB1*, *PI3*, and *SLPI* were determined using quantitative PCR and normalized to *GAPDH*. Data were normalized to untreated samples, and differences were assessed using Student's t-test (n = 4; \*\*\*\* p < 0.0001).
